# Supplementary figures and images for: Kappa free light chains is a valid tool in the diagnostics of MS: A large multicenter study
Source: PubMed Central journal article supplement — Mult Scler. 2019 May 8;26(8):912–23. doi: 10.1177/1352458519845844 (PMC7350201; doi:10.1177/1352458519845844), 2019-05-08

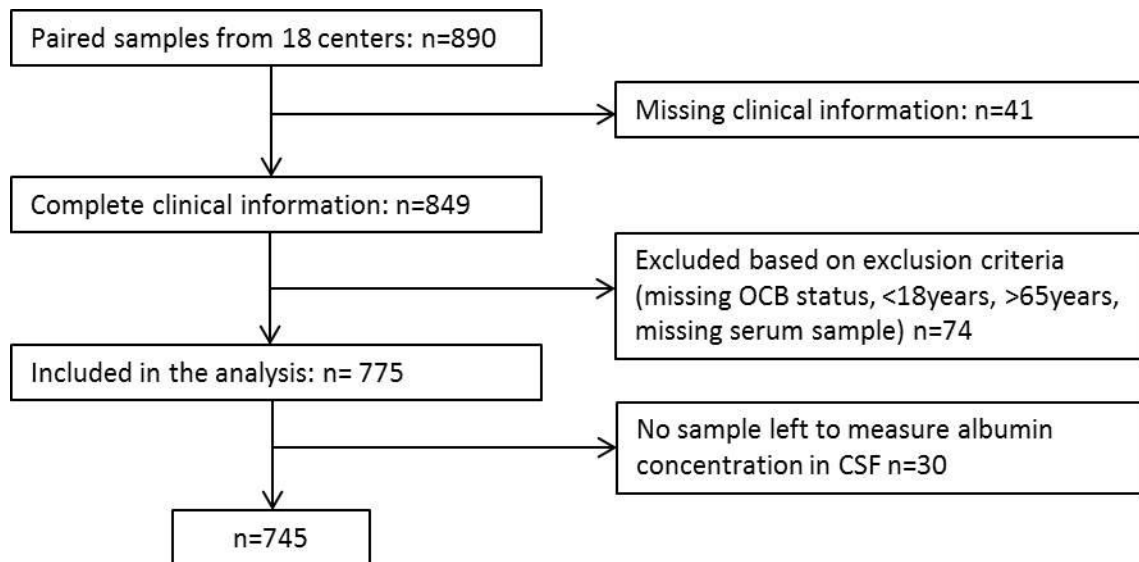

**Supplementary Figure 1. Flow-chart of patient selection.**

Supplement: MSJ845844_Supplementary_Figure_1.pdf [file MSJ845844_Supplementary_Figure_1.pdf]
